# Supplementary material for: Advanced Anterior Eye Segment Imaging for Ichthyosis
Source: Preprints.org preprint supplement (doi:10.20944/preprints202306.1259.v1), 2023-06-16
Supplement: Supplementary file 3 [file supplementary]

| Table S1. BCVA, ocular surface examination and corneal topography and thickness map results. | | | | | | | | |
| --- | --- | --- | --- | --- | --- | --- | --- | --- |
| Parameter | P1 | P2 | P3 | P4 | P5 | min | max | median |
| BCVA | RE 0,8  LE 0,7 | RE 0,2  LE LP | RE 0,05  LE 0,1 | RE 0,3  LE 0,2 | RE 1,0  LE 0,4 | LP | 1,0 | 0,25 |
| TBUT [s] | RE 6  LE 8 | RE 4  LE 4 | RE 7  LE 8 | RE 5  LE 5 | RE 12  LE 8 | 4 | 10 | 6,5 |
| Fluorescein staining [Oxforrd scale] | RE IV  LE II | RE III  LE IV | RE IV  LE III | RE II  LE II | RE 0  LE I | 0 | IV |  |
| kKs [D] | RE 43,1  LE 42,0 | RE 48,1  LE 68,6 | RE 57,3  LE 53,4 | RE 50,4  LE 47,5 | RE 45,1  LE44,7 | 42 | 68,6 | 47,8 |
| kKf [D] | RE 41,2  LE 41,5 | RE 45,8  LE 62,8 | RE 53,6  LE 46,3 | RE 47,4  LE 46,4 | RE 42,7  LE 42,2 | 41,2 | 62,8 | 46,05 |
| kCYL [D] | RE 1,9  LE 0,5 | RE 2,3  LE 6,2 | RE 3,8  LE 7,1 | RE 2,9  LE 1,2 | RE 2,4  LE 2,5 | 0,5 | 7,1 | 2,45 |
| kAvgK [D] | RE 42,1  LE 41,8 | RE 47,0  LE 66,2 | RE 55,4  LE 49,8 | RE 48,9  LE 47,0 | RE 43,9  LE 43,5 | 41,8 | 66,2 | 47 |
| kEcc | RE 0,21  LE 0,32 | RE 0,31  LE 0,32 | RE 0,54  LE 0,55 | RE 0,73  LE 0,61 | RE 0,53  LE 0,59 | 0,21 | 0,73 | 0,53 |
| kAA [%] | RE 97,2  LE 98,9 | RE 94,0  LE 89 | RE 100  LE 99,9 | RE 97  LE 90 | RE 93,3  LE 97,5 | 89 | 100 | 97,1 |
| kACCP [D] | RE 42,1  LE 41,8 | RE 47,4  LE 65,5 | RE 55,7  LE 49,4 | RE 49,4  LE 47,0 | RE 43,9  LE 43,8 | 41,8 | 65,5 | 47,2 |
| pKs [D] | RE -6,2  LE -6,3 | RE -6,5  LE -11,1 | RE -8,0  LE -6,8 | RE -7,7  LE -6,9 | RE -6,8  LE -6,7 | -11,1 | -6,2 | -6,8 |
| pKf [D] | RE -5,9  LE -6,0 | RE -6,5  LE -9,3 | RE -7,3  LE -6,3 | RE -7,1  LE -6,5 | RE -6,1  LE -6,0 | -9,3 | -5,9 | -6,4 |
| pCYL [D] | RE 0,3  LE 0,3 | RE 0,1  LE 1,8 | RE 0,7  LE 0,6 | RE 0,6  LE 0,4 | RE 0,7  LE 0,7 | 0,1 | 1,8 | 0,6 |
| pAvgK [D] | RE -6,0  LE -6,2 | RE -6,5  LE -10,1 | RE -7,6  LE -6,5 | RE -7,4  LE -6,7 | RE -6,4  LE -6,3 | -10,1 | -6 | -6,5 |
| pEcc | RE 0,48  LE 0,65 | RE 0,31  LE 0,83 | RE 0,59  LE 0,57 | RE 0,83  LE 0,65 | RE 0,7  LE 0,6 | 0,31 | 0,83 | 0,63 |
| pAA [%] | RE 94  LE 94,6 | RE 91,4  LE 66,7 | RE 100  LE 98,5 | RE 94,5  LE 88,1 | RE 90,7  LE 95,2 | 66,7 | 100 | 94,25 |
| rKs [D] | RE 42,1  LE 40,9 | RE 47,3  LE 65,4 | RE 58,0  LE 52,9 | RE 48,6  LE 46,2 | RE 43,6  LE 43,3 | 40,9 | 65,4 | 46,75 |
| rKf [D] | RE 40,0  LE 40,1 | RE 44,9  LE 63,8 | RE 52,6  LE 45,6 | RE 46,0  LE 45,2 | RE 41,6  LE 41,1 | 40 | 63,8 | 45,05 |
| rCYL [D] | RE 2,0  LE 0,8 | RE 2,4  LE 1,9 | RE 5,4  LE 7,3 | RE 2,6  LE 1,0 | RE 2,1  LE 2,1 | 0,8 | 7,3 | 2,1 |
| rAvgK [D] | RE 41,0  LE 40,5 | RE 46,1  LE 64,4 | RE 55,3  LE 49,2 | RE 47,3  LE 45,7 | RE 42,6  LE 42,2 | 40,5 | 64,4 | 45,9 |
| rAA [%] | RE 94  LE 94,6 | RE 91,4  LE 58,6 | RE 100  LE 98,5 | RE 94,5  LE 88,1 | RE 90,7  LE 95,2 | 58,6 | 100 | 94,25 |
| rACCP [D] | RE 41,0  LE 40,5 | RE 46,5  LE 62,1 | RE 55,1  LE 48,7 | RE 47,8  LE 45,8 | RE 42,6  LE 42,6 | 41 | 62,1 | 46,15 |
| CAT[µm] | RE 539  LE 529 | RE 606  LE 734 | RE 573  LE 552 | RE 480  LE 505 | RE 545  LE 548 | 480 | 734 | 546,5 |
| CTT [µm] | RE 520  LE 509 | RE 528  LE 395 | RE 356  LE 459 | RE 462  LE 498 | RE 540  LE 540 | 356 | 540 | 503,5 |
| CAT-CTT | RE 10  LE 20 | RE 78  LE 375 | RE 217  LE 93 | RE 18  LE 7 | RE 5  LE 8 | 5 | 375 | 19 |
| ACD [mm] | RE 2,97  LE 2,94 | RE 2,27  LE 1,9 | RE 2,86  LE 2,81 | RE 3,03  LE 2,95 | RE 3,02  LE 2,91 | 1,9 | 3,03 | 2,925 |
| ESI [%] | RE 0  LE 0 | RE 95  LE 95 | RE 95  LE 50 | RE 61  LE 7 | RE 0  LE 0 | 0 | 95 | 28,5 |
| BCVA, best corrected visual acuity; TBUT, tear break-up time; (k) keratometric; (p) posterior; (r) real; Ks, keratometry steep; Kf; keratometry flat; CYL, astigmatism, AvgK average keratometry; Ecc, eccentricity of the corneal curve; AA, area analyzed, ACCP, average central corneal power; CAT, corneal apex thickness; CTT, corneal thinnest thickness, ACD, anterior chamber depth, Esi, ectasia screening index. | | | | | | | | |

| Table S2. Fourier Indices results. | | | | | | | | |
| --- | --- | --- | --- | --- | --- | --- | --- | --- |
| Parameter | P1 | P2 | P3 | P4 | P5 | min | max | median |
| 3 mm k Spherical | RE 42,11  LE 41,79 | RE 47,67*  LE 68,43* | RE 55,64*  LE 49,38* | RE 49,64*  LE 46,93 | RE 43,84  LE 43,97 | 41,79 | 68,43 | 47,3 |
| 3 mm k Reg. Astigmatism | RE 0,94  LE 0,21 | RE 1,47*  LE 5,67* | RE 1,97*  LE 3,57* | RE 1,51*  LE 0,69 | RE 1,19  LE 1,21 | 0,21 | 5,67 | 1,34 |
| 3 mm k Asymmetry | RE 0,41  LE 0,4 | RE 7,66*  LE 5,36* | RE 4,06*  LE 0,83* | RE 2,64*  LE 0,67 | RE 0,21  LE 0,14 | 0,14 | 7,66 | 0,75 |
| 3 mm k Higher Order | RE 0,28*  LE 0,34* | RE 2,36*  LE 5,94* | RE 6,69*  LE 1,74* | RE 0,12  LE 0,11 | RE 0,16  LE 0,8 | 0,11 | 6,69 | 0,34 |
| 6 mm k Spherical | RE 42,1  LE 41,83 | RE 44,93  LE 64,18* | RE 53,55*  LE 48,56* | RE 48,65*  LE 46,74 | RE 43,77  LE 43,6 | 41,83 | 64,18 | 45,84 |
| **6 mm k Reg. Astigmatism** | **RE 1,08***  **LE 0,3** | **RE 1,84***  **LE 4,86*** | **RE 2,14***  **LE 3,32*** | **RE 1,48***  **LE 0,6** | **RE 1,21***  **LE 1,31*** | **0,3** | **4,86** | **1,39** |
| 6 mm k Asymmetry | RE 0,48  LE 0,5 | RE 10,39*  LE 5,81* | RE 6,07*  LE 1,32* | RE 3,19*  LE 0,9* | RE 0,38  LE 0,31 | 0,31 | 10,39 | 1,11 |
| 6 mm k Higher Order | RE 0,42*  LE 0,39* | RE 2,32*  LE 6,01* | RE 0,81*  LE 1,72* | RE 0,15  LE 0,12 | RE 0,16  LE 0,22 | 0,12 | 6,01 | 0,41 |
| 3 mm a Spherical | RE 46,92  LE 46,56 | RE 53,11*  LE 74,32* | RE 61,98*  LE 55,01* | RE 54,2*  LE 52,28 | RE 48,84  LE 48,99 | 46,56 | 74,32 | 52,69 |
| 3 mm a Reg, Astigmatism | RE 1,05  LE 0,24 | RE 1,64*  LE 6,31* | RE 2,2*  LE 3,97* | RE 1,64*  LE 0,77 | RE 1,33  LE 1,34 | 0,24 | 6,31 | 1,49 |
| 3 mm a Asymmetry | RE 0,46  LE 0,45 | RE 8,53*  LE 5,96* | RE 4,52*  LE 0,93* | RE 3,55*  LE 0,75* | RE 0,23  LE 0,16 | 0,16 | 8,53 | 0,84 |
| 3 mm a Higher Order | RE 0,31*  LE 0,38* | RE 2,63*  LE 6,61* | RE 0,77*  LE 1,94* | RE 0,17  LE 0,12 | RE 0,18  LE 0,20 | 0,12 | 6,61 | 0,34 |
| 6 mm a Spherical | RE 46,9  LE 46,6 | RE 50,5  LE 71,5* | RE 59,66*  LE 54,10* | RE 54,2*  LE 52,08 | RE 48,76  LE 48,57 | 46,6 | 71,5 | 51,29 |
| **6 mm a Reg. Astigmatism** | **RE 1,2***  **LE 0,33** | **RE 2,06***  **LE 5,41*** | **RE 2,38***  **LE 3,69*** | **RE 1,64***  **LE 0,67** | **RE 1,35***  **LE 1,46*** | **0,33** | **5,41** | **1,55** |
| 6 mm a Asymmetry | RE 0,54  LE 0,56 | RE 11,57*  LE 7,59* | RE 6,76*  LE 1,47* | RE 3,55*  LE 1,01* | RE 0,42  LE 0,35 | 0,35 | 11,57 | 1,24 |
| 6 mm a Higher Order | RE 0,47*  LE 0,43* | RE 2,59*  LE 6,73* | RE 0,91*  LE 1,92* | RE 0,17  LE 0,13 | RE 0,18  LE 0,24 | 0,13 | -6,73 | 0,45 |
| 3 mm p Spherical | RE -6,02  LE -6,15 | RE -6,54  LE -10,2* | RE -7,02*  LE -6,43 | RE -7,38*  LE -6,72 | RE -6,4  LE -6,34 | -10,2 | -6,02 | -6,48 |
| **3 mm p Reg. Astigmatism** | **RE 0,14**  **LE 0,14** | **RE 0,38***  **LE 1,93*** | **RE 0,88***  **LE 0,23** | **RE 0,34***  **LE 0,19** | **RE 0,35***  **LE 0,33** | **0,14** | **1,93** | **0,34** |
| **3 mm p Asymmetry** | **RE 0,12**  **LE 0,15*** | **RE 1,25***  **LE 0,41*** | **RE 1,97***  **LE 0,86*** | **RE 1,09***  **LE 0,14*** | **RE 0,07**  **LE 0,03** | **0,03** | **1,97** | **0,15** |
| **3 mm p Higher Order** | **RE 0,04***  **LE 0,06*** | **RE 0,23***  **LE 1,81*** | **RE 0,93***  **LE 0,16*** | **RE 0,07***  **LE 0,03** | **RE 0,02**  **LE 0,03** | **0,02** | **1,81** | **0,06** |
| 6 mm p Spherical | RE -6,0  LE -6,1 | RE -6,43  LE -9,51* | RE -6,89*  LE -6,42 | RE -7,14*  LE -6,69 | RE -6,36  LE -6,3 | -9,51 | -6,0 | -6,425 |
| **6 mm p Reg. Astigmatism** | **RE 0,13**  **LE 0,12** | **RE 0,3**  **LE 1,74*** | **RE 0,73***  **LE 0,29** | **RE 0,34***  **LE 0,18** | **RE 0,32***  **LE 0,31*** | **0,12** | **1,74** | **0,31** |
| 6 mm p Asymmetry | RE 0,12  LE 0,14 | RE 1,31*  LE 0,75* | RE 2,03*  LE 0,93* | RE 1,05*  LE 0,13 | RE 0,09  LE 0,04 | 0,04 | 2,03 | 0,445 |
| **6 mm p Higher Order** | **RE 0,05**  **LE 0,06*** | **RE 0,21***  **LE 1,81*** | **RE 0,84***  **LE 0,15*** | **RE 0,06***  **LE 0,03** | **RE 0,02**  **LE 0,04** | **0,02** | **1,81** | **0,06** |
| *out of reference range (normative database); bolt font – parameters, which showed abnormalities for at least four patients in at least one eye; RE right eye; LE left eye; (k), keratometric; (a) anterior; (p) posterior; Reg., regular. | | | | | | | | |
